# Supplementary material
Source: PubMed Central journal article supplement (PMC438996)

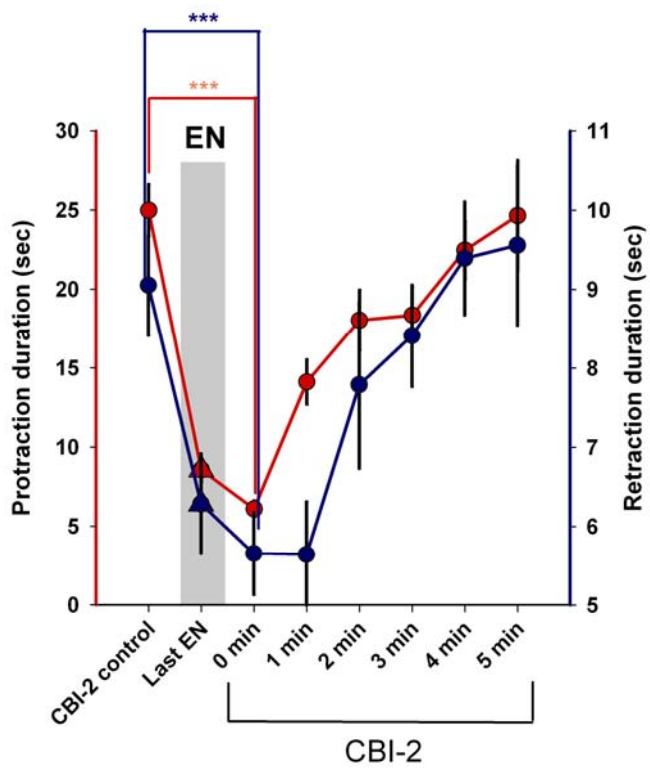

Supplement: pnas_101_25_9447__2.pdf [file pnas_101_25_9447__2.pdf]
